# Supplementary material for: Exploring TAR–RNA aptamer loop–loop interaction by X-ray crystallography, UV spectroscopy and surface plasmon resonance
Source: PubMed Central journal article supplement — Nucleic Acids Res. 2008 Nov 7;36(22):7146–56. doi: 10.1093/nar/gkn831 (PMC2602780; doi:10.1093/nar/gkn831), 2008-11-07
Supplement: gkn831_1.pdf [file gkn831_1.pdf]

## Supplementary material

**Table 1:** Comparison of distances between the crystal structure, the NMR structure by Van Melckebeke *et al.* and the model by Beaurain *et al.* (1,2). Differences in comparison to the crystal structure are indicated in bracket.

| Geometric parameters  | X-Ray | NMR                  | Molecular Dynamics |
|-----------------------|-------|----------------------|--------------------|
| <b>Turns</b>          |       |                      |                    |
| C5(P)-U7(P)           | 5.73  | 5.25 ± 0.08 (-0.48)  | 5.47 (-0.26)       |
| C5(P)-G8(P)           | 10.35 | 9.37 ± 0.12 (-0.98)  | 8.42 (-1.93)       |
| G5*(P)-C7*(P)         | 5.72  | 9.61 ± 0.38 (+3.89)  | 5.35 (-0.37)       |
| G5*(P)-C8*(P)         | 10.58 | 14.32 ± 0.47 (+3.74) | 9.4 (-1.18)        |
| G5*(P)-A12*(P)        | 18.59 | 20.76 ± 0.18 (+2.17) | 18.29 (-0.30)      |
| U6*(P)-A11(P)         | 17.17 | 21.00 ± 0.18 (+3.83) | 17.4 (-0.23)       |
| <b>G5*•A12* pair</b>  |       |                      |                    |
| N1(G*)-N1(A*)         | 2.91  | 2.83 ± 0.01 (-0.09)  | 3.15 (+0.19)       |
| O6(G*)-N6(A*)         | 2.99  | 2.57 ± 0.04 (-0.42)  | 2.85 (-0.14)       |
| C1'(G*)-C1'(A*)       | 12.74 | 12.60 ± 0.01 (-0.14) | 13.06 (+0.17)      |
| <b>Hydrogen bonds</b> |       |                      |                    |
| G5*(O2')-C5(O3')      | 3.38  | 2.60 ± 0.11 (-0.78)  | 5.55 (+2.17)       |
| G5*(O2')-C6(O5')      | 4.69  | 2.23 ± 0.01 (-2.42)  | 4.55 (-0.14)       |
| G5*(O2')-C6(O1p)      | 4.47  | 4.13 ± 0.06 (-0.34)  | 3.61 (-0.86)       |
| G5*(O2')-C6(O2p)      | 2.57  | 2.86 ± 0.14 (+0.29)  | 5.79 (+3.22)       |
| C5(O2')-U6*(O1p)      | 3.30  | 3.37 ± 0.57 (+0.07)  | 4.18 (+0.88)       |
| C5(O2')-U6*(O2p)      | 2.79  | 5.04 ± 0.19 (+2.25)  | 5.55 (+2.76)       |

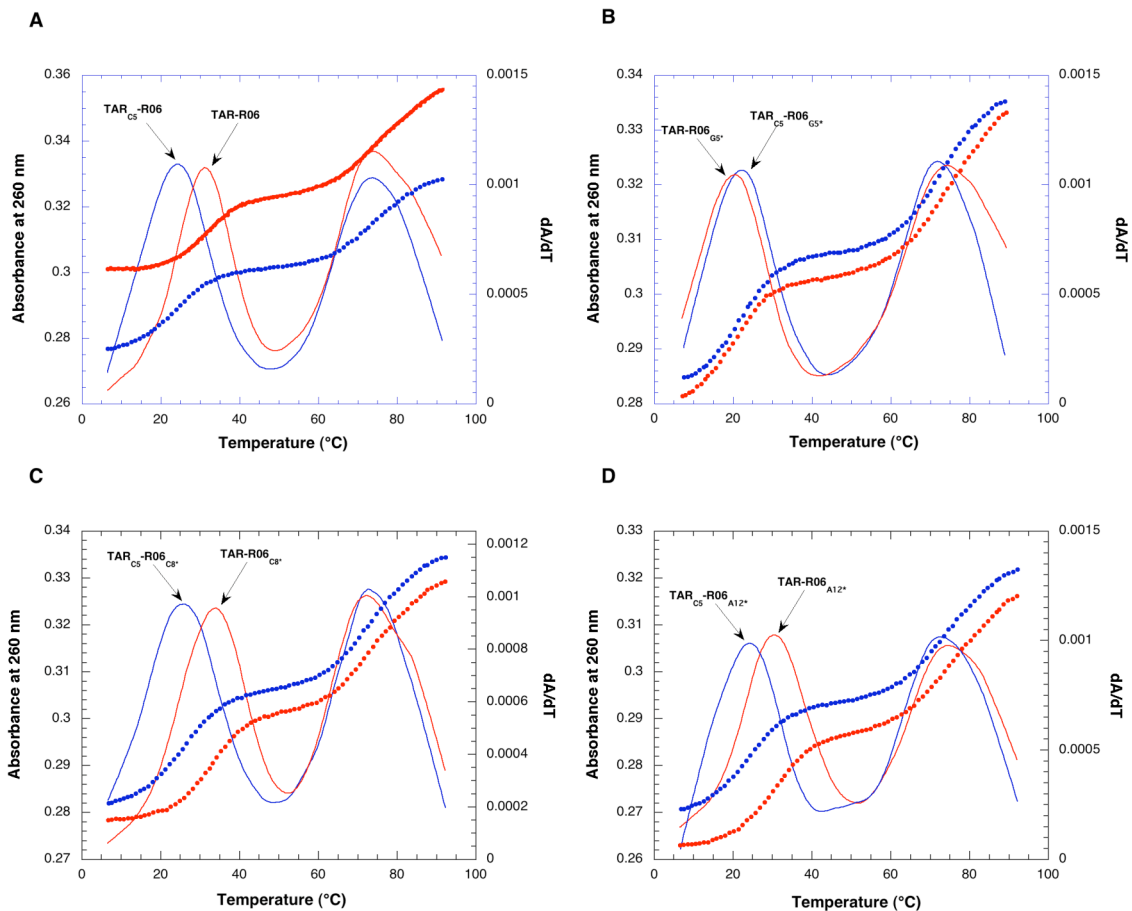

Figure 1: Melting transitions and first derivative curves for TAR-R06 modified complexes. The experiments were performed at  $1 \mu\text{M}$  or each RNA in a 10 mM sodium phosphate buffer, pH 7.2 at  $20^\circ\text{C}$ , containing 140 mM potassium chloride, 20 mM sodium chloride and 0.3 mM magnesium. Denaturation of the samples was achieved by increasing the temperature at a  $0.4^\circ\text{C}/\text{min}$  rate from  $5^\circ\text{C}$  to  $95^\circ\text{C}$  and was followed at 260 nm. A) Thermal denaturation of TAR-R06 (red curves) and TAR<sub>C5</sub>-R06 (blue curves) complexes. B) Thermal denaturation of TAR-R06<sub>G5\*</sub> (red curves) and TAR<sub>C5</sub>-R06<sub>G5\*</sub> (blue curves) complexes. C) Thermal denaturation of TAR-R06<sub>C8\*</sub> (red curves) and TAR<sub>C5</sub>-R06<sub>C8\*</sub> (blue curves) complexes. D) Thermal denaturation of TAR-R06<sub>A12\*</sub> (red curves) and TAR<sub>C5</sub>-R06<sub>A12\*</sub> (blue curves) complexes. Subscripts refer to 2'-O-methyl residues at the indicated positions (see Figure 1A).

1. Beaurain, F., Di Primo, C., Toulmé, J.J. and Laguerre, M. (2003) Molecular dynamics reveals the stabilizing role of loop closing residues in kissing interactions: comparison between TAR-TAR\* and TAR-aptamer. *Nucleic Acids Res*, **31**, 4275-4284.

2. Van Melckebeke, H., Devany, M., Di Primo, C., Beaurain, F., Toulmé, J.J., Bryce, D.L. and Boisbouvier, J. (2008) Liquid-crystal NMR structure of HIV TAR RNA bound to its SELEX RNA aptamer reveals the origins of the high stability of the complex. *Proc. Natl. Acad. Sci USA*, **105**, 9210-9215.
